# Supplementary material
Source: MDPI journal article supplement (https://www.mdpi.com/2079-6439/9/6/37)
Supplement: s1 [file s1]

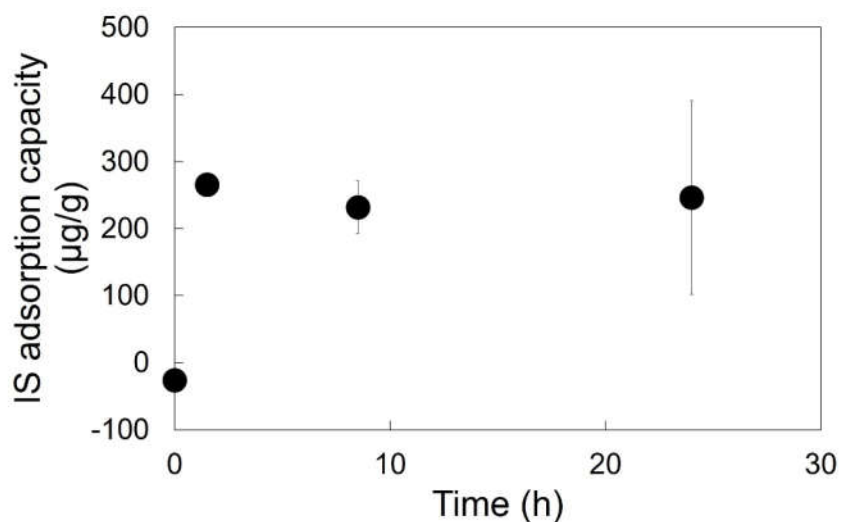

**Figure S1.** IS adsorption capacity of zeolite 7H240 at the different times ( $n = 3$ ).

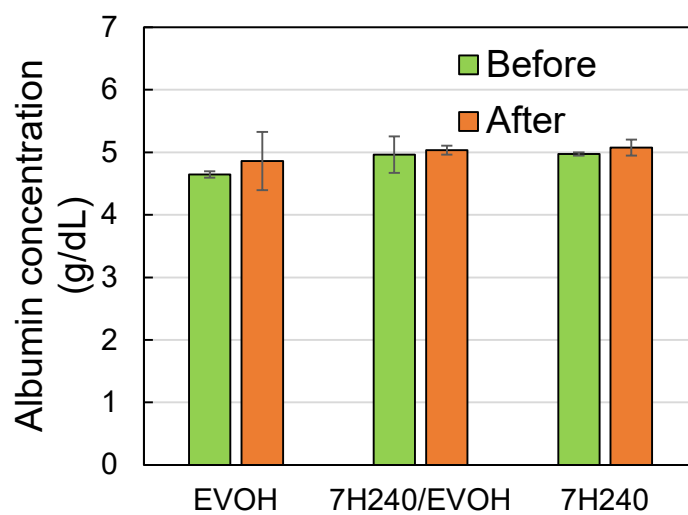

**Figure S2.** Albumin concentrations before and after an adsorption test at 37 °C for 24 h ( $n = 3$ ).

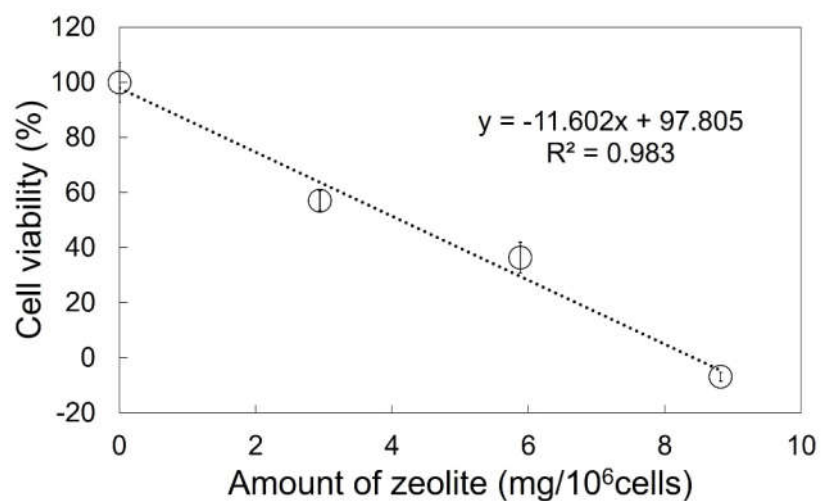

**Figure S3.** Cytotoxicity of zeolite 7H240 powder in Raw 264.7 cells after incubation at 37 °C for 24 h ( $n = 6$ ).

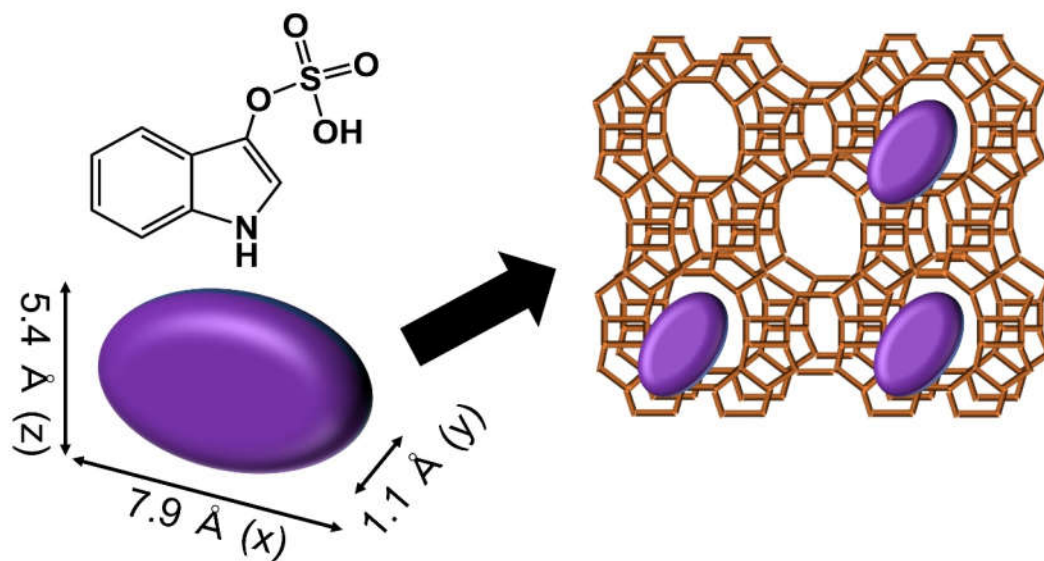

Figure S4. Schematic image of IS adsorption in zeolite.
